# Supplementary material
Source: PubMed Central journal article supplement (PMC3523645)
Supplement: supp_mcs228_mcs228supp.pdf [file supp_mcs228_mcs228supp.pdf]

## SUPPLEMENTARY DATA

TABLE S1. Light wavelength range and maxima, light source and supplier for the UV light experiments.

| UV range                              | UV Max | Light source                                    | Supplier                                      | Catalogue no. |
|---------------------------------------|--------|-------------------------------------------------|-----------------------------------------------|---------------|
| <i>For Chiloglottis trapeziformis</i> |        |                                                 |                                               |               |
| UV-C<br>(mostly 254)                  | 254    | LZC UVC-01                                      | Luzchem Research, Canada                      | LZC UVC-01    |
| UV-B<br>(280–315)                     | 300    | LZC UVB-01 <sup>1</sup>                         | Luzchem Research, Canada                      | LZC UVB-01    |
| UV-A<br>(315–400)                     | 350    | LZC UVA-01                                      | Luzchem Research, Canada                      | LZC UVA-01    |
| 420                                   | 420    | LZC 420                                         | Luzchem Research, Canada                      | LZC 420       |
| <i>For Chiloglottis seminuda</i>      |        |                                                 |                                               |               |
| UV-C<br>(254)                         | 254    | GT85 Sankyo Denki 8 Watt lamp                   | Hitachi, Japan                                | GT85          |
| UV-B<br>(280–315)                     | 300    | Rayonet photochemical reactor lamp <sup>1</sup> | Southern New England Ultraviolet Company, USA | RPR 3100A     |
| UV-A<br>(315–400)                     | 352    | F8T5BLB Sankyo Denki 8 Watt lamp                | Hitachi, Japan                                | F8T5BLB       |
| 420                                   | 420    | LZC 420                                         | Luzchem Research, Canada                      | LZC 420       |

<sup>1</sup>The emission compatibility of the LZC and Rayonet UV-B fluorescent lamp is identical.

<http://www.rayonet.org>

<http://www.sankyo-denki.co.jp>

<http://www.luzchem.com/>
